# Supplementary material for: Structural modification of acrylonitrile–butadiene–styrene waste as an efficient nanoadsorbent for removal of metal ions from water: isotherm, kinetic and thermodynamic study
Source: Royal Society of Chemistry journal article supplement (doi:10.1039/c4ra10830b), 2014-11-26
Supplement: c4ra10830b1.pdf [file c4ra10830b1.pdf]

## **Supporting Information**

### **Structural modification of Acrylonitrile–Butadiene–Styrene waste as an efficient nanoadsorbent for removal of metal ions from water: Isotherm, kinetic and thermodynamic study**

**Arameh Masoumi, Khadijeh Hemati, Mousa Ghaemy\***

Polymer Chemistry Research Laboratory, Chemistry Faculty, University of Mazandaran, Babolsar, Iran.

\* Corresponding author. Tel.: +98-11-35342353; FAX: +98-11-35342350 . E-mail address: ghaemy@umz.ac.ir (Mousa Ghaemy).

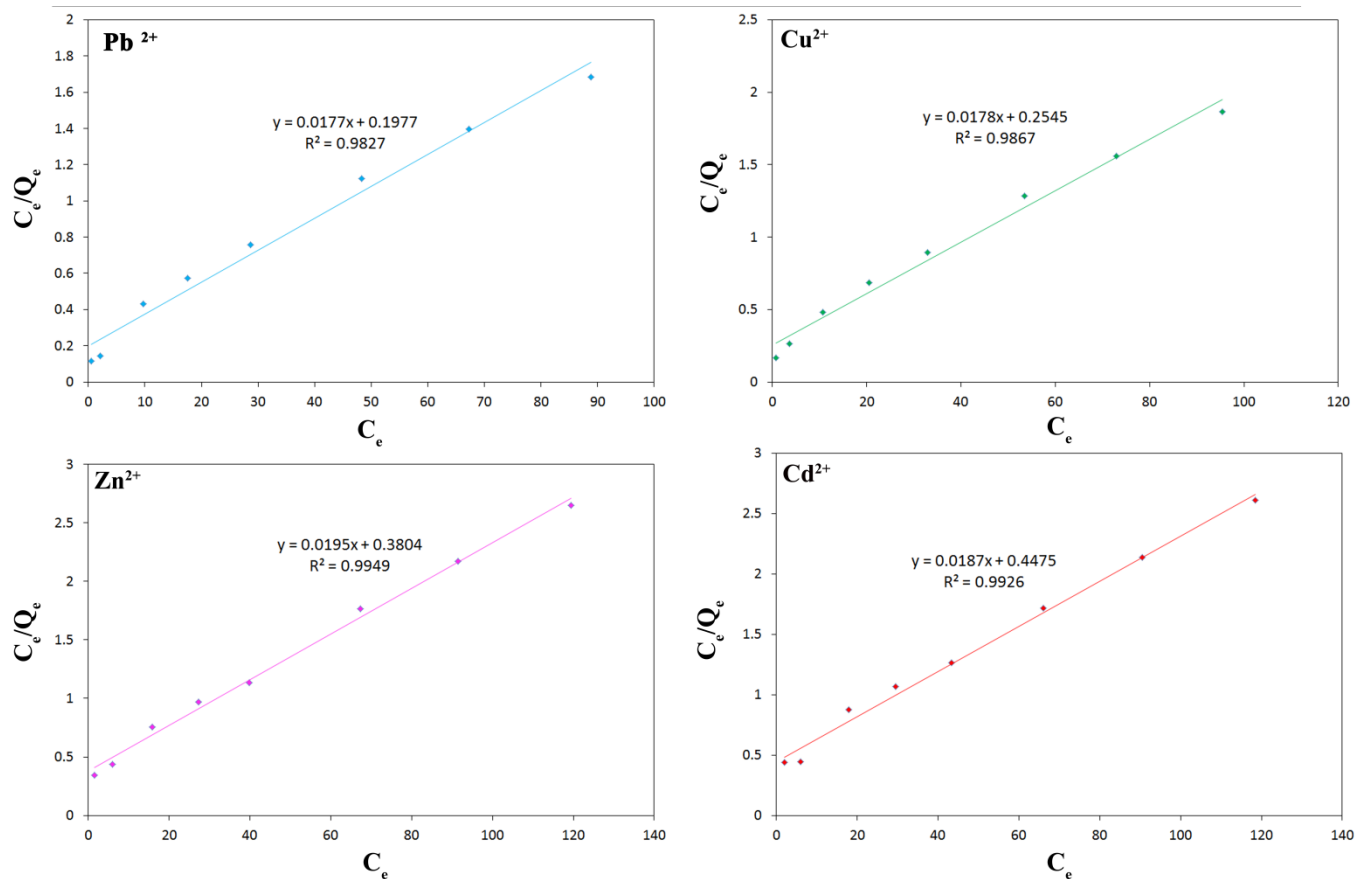

**Figure 1S.** The linear dependence of  $C_e/Q_e$  on  $C_e$  according to Langmuir equation (Eq. 5) (pH, 6; initial concentration, 20–300 mg L<sup>-1</sup>; temperature, 303 K; adsorbent dose, 100mg; contact time, 2 h; volume 25ml).

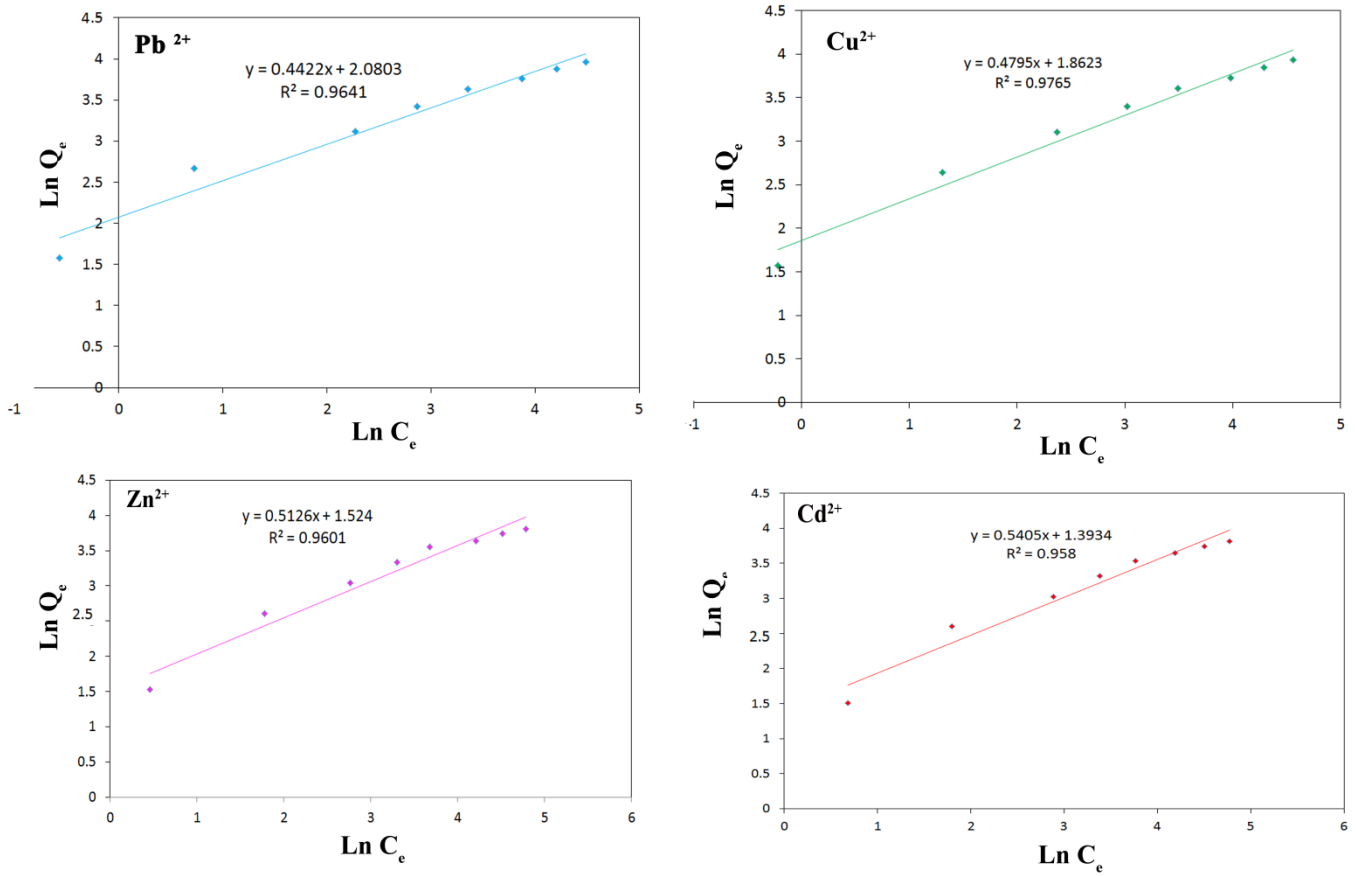

**Figure 1S.** The linear dependence of  $\ln Q_e$  on  $\ln C_e$  according to Freundlich equation (4) (pH, 6; initial concentration, 20–300 mg L<sup>-1</sup>; temperature, 303 K; adsorbent dose, 100mg; contact time, 2 h; volume 25 ml).
